# Supplementary material for: CODEX multiplexed tissue imaging with DNA-conjugated antibodies
Source: Springer Nature journal article supplement (doi:10.1038/s41596-021-00556-8), 2021-07-02
Supplement: MOESM3 [file 41596_2021_556_MOESM3_ESM29.xlsx]

## Sheet: Supplementary_Table_1
Supplementary Table 1: Oligonucleotide sequences. Note that commercially supplied antibody-oligonucleotide pairs (e.g, from Akoya) are proprietary and cannot be substituted into this protocol.
No.	Antibody oligo sequence (5'-3')	Fluorescent oligonucleotide sequences (5'-3')			Blocking component 4 (BC4) oligos (5'-3')
2	/mal/ATGGTTTAGGACTAC	/5Alex488N/GTAGTCCTAAACCAT	/5ATTO550N/GTAGTCCTAAACCAT		GTAGTCCTAAACCAT
3	/mal/TACTCCTCGCCG	/5Alex488N/CGGCGAGGAGTA	/5ATTO550N/CGGCGAGGAGTA	/5Alex647N/CGGCGAGGAGTA	CGGCGAGGAGTA
5	/mal/TCTCCCATTAGTCGG	/5Alex488N/CCGACTAATGGGAGA	/5ATTO550N/CCGACTAATGGGAGA		CCGACTAATGGGAGA
6	/mal/TGGATGTGTTACGAT	/5Alex488N/ATCGTAACACATCCA	/5ATTO550N/ATCGTAACACATCCA	/5Alex647N/ATCGTAACACATCCA	ATCGTAACACATCCA
7	/mal/CGCTAAGATATTCTAAG	/5Alex488N/CTTAGAATATCTTAGCG	/5ATTO550N/CTTAGAATATCTTAGCG		CTTAGAATATCTTAGCG
8	/mal/CGCAGATGAATATTC	/5Alex488N/GAATATTCATCTGCG	/5ATTO550N/GAATATTCATCTGCG	/5Alex647N/GAATATTCATCTGCG	GAATATTCATCTGCG
11	/mal/GGGTTATACACTCGT	/5Alex488N/ACGAGTGTATAACCC	/5ATTO550N/ACGAGTGTATAACCC		ACGAGTGTATAACCC
14	/mal/AGATTCAGTCTCTCG	/5Alex488N/CGAGAGACTGAATCT	/5ATTO550N/CGAGAGACTGAATCT		CGAGAGACTGAATCT
15	/mal/CTGTAATAGGCACTA	/5Alex488N/TAGTGCCTATTACAG	/5ATTO550N/TAGTGCCTATTACAG	/5Alex647N/TAGTGCCTATTACAG	TAGTGCCTATTACAG
20	/mal/ATGTAGGATGGTCTC		/5ATTO550N/GAGACCATCCTACAT	/5Alex647N/GAGACCATCCTACAT	GAGACCATCCTACAT
21	/mal/CGTGCCGTTTCAC	/5Alex488N/GTGAAACGGCACG	/5ATTO550N/GTGAAACGGCACG	/5Alex647N/GTGAAACGGCACG	GTGAAACGGCACG
23	/mal/GGTTTCCTCAGACAC	/5Alex488N/GTGTCTGAGGAAACC	/5ATTO550N/GTGTCTGAGGAAACC	/5Alex647N/GTGTCTGAGGAAACC	GTGTCTGAGGAAACC
24	/mal/ATAAGGGCTCATTGT	/5Alex488N/ACAATGAGCCCTTAT	/5ATTO550N/ACAATGAGCCCTTAT	/5Alex647N/ACAATGAGCCCTTAT	ACAATGAGCCCTTAT
25	/mal/GCACGCCCTTTTA		/5ATTO550N/TAAAAGGGCGTGC	/5Alex647N/TAAAAGGGCGTGC	TAAAAGGGCGTGC
26	/mal/CACTTGTCTAACCAA	/5Alex488N/TTGGTTAGACAAGTG	/5ATTO550N/TTGGTTAGACAAGTG	/5Alex647N/TTGGTTAGACAAGTG	TTGGTTAGACAAGTG
28	/mal/TGGTCCACTAACGTA	/5Alex488N/TACGTTAGTGGACCA	/5ATTO550N/TACGTTAGTGGACCA	/5Alex647N/TACGTTAGTGGACCA	TACGTTAGTGGACCA
29	/mal/ATAGGGCATTTGAAG	/5Alex488N/CTTCAAATGCCCTAT	/5ATTO550N/CTTCAAATGCCCTAT	/5Alex647N/CTTCAAATGCCCTAT	CTTCAAATGCCCTAT
30	/mal/CACATGAGCGAATCA		/5ATTO550N/TGATTCGCTCATGTG	/5Alex647N/TGATTCGCTCATGTG	TGATTCGCTCATGTG
32	/mal/TACCAAATCCTGATG	/5Alex488N/CATCAGGATTTGGTA	/5ATTO550N/CATCAGGATTTGGTA	/5Alex647N/CATCAGGATTTGGTA	CATCAGGATTTGGTA
33	/mal/TTATCATGAGGAGCG	/5Alex488N/CGCTCCTCATGATAA		/5Alex647N/CGCTCCTCATGATAA	CGCTCCTCATGATAA
36	/mal/ACCTACACAATGCTA	/5Alex488N/TAGCATTGTGTAGGT	/5ATTO550N/TAGCATTGTGTAGGT		TAGCATTGTGTAGGT
38	/mal/GCGTCTACTTATAAG	/5Alex488N/CTTATAAGTAGACGC	/5ATTO550N/CTTATAAGTAGACGC		CTTATAAGTAGACGC
41	/mal/TGTATGAGTAGTAATCT	/5Alex488N/AGATTACTACTCATACA	/5ATTO550N/AGATTACTACTCATACA	/5Alex647N/AGATTACTACTCATACA	AGATTACTACTCATACA
42	/mal/TCTAAGTCAGAGAGC		/5ATTO550N/GCTCTCTGACTTAGA	/5Alex647N/GCTCTCTGACTTAGA	GCTCTCTGACTTAGA
43	/mal/GACATTATCCGTGAT	/5Alex488N/ATCACGGATAATGTC	/5ATTO550N/ATCACGGATAATGTC	/5Alex647N/ATCACGGATAATGTC	ATCACGGATAATGTC
44	/mal/TCACTACTATTAGTACT	/5Alex488N/AGTACTAATAGTAGTGA	/5ATTO550N/AGTACTAATAGTAGTGA		AGTACTAATAGTAGTGA
45	/mal/GCCAGAATGCCA		/5ATTO550N/TGGCATTCTGGC	/5Alex647N/TGGCATTCTGGC	TGGCATTCTGGC
46	/mal/GACTCGAACCTGAG	/5Alex488N/CTCAGGTTCGAGTC		/5Alex647N/CTCAGGTTCGAGTC	CTCAGGTTCGAGTC
48	/mal/GCACGGCAAAGTG	/5Alex488N/CACTTTGCCGTGC	/5ATTO550N/CACTTTGCCGTGC	/5Alex647N/CACTTTGCCGTGC	CACTTTGCCGTGC
49	/mal/ATAACGCCTCGTATC	/5Alex488N/GATACGAGGCGTTAT	/5ATTO550N/GATACGAGGCGTTAT		GATACGAGGCGTTAT
51	/mal/CGTGCGGGAAAAT	/5Alex488N/ATTTTCCCGCACG		/5Alex647N/ATTTTCCCGCACG	ATTTTCCCGCACG
52	/mal/ACCAGGTGATTGCAT		/5ATTO550N/ATGCAATCACCTGGT	/5Alex647N/ATGCAATCACCTGGT	ATGCAATCACCTGGT
53	/mal/TATCCCGTAAACTTC		/5ATTO550N/GAAGTTTACGGGATA	/5Alex647N/GAAGTTTACGGGATA	GAAGTTTACGGGATA
55	/mal/AGGTCAACTCGCAC	/5Alex488N/GTGCGAGTTGACCT	/5ATTO550N/GTGCGAGTTGACCT		GTGCGAGTTGACCT
56	/mal/GGTCACATGGTCGTT	/5Alex488N/AACGACCATGTGACC	/5ATTO550N/AACGACCATGTGACC	/5Alex647N/AACGACCATGTGACC	AACGACCATGTGACC
57	/mal/GCGGATTTCGTATTT	/5Alex488N/AAATACGAAATCCGC	/5ATTO550N/AAATACGAAATCCGC	/5Alex647N/AAATACGAAATCCGC	AAATACGAAATCCGC
58	/mal/CGTCAGTACTTTCAG	/5Alex488N/CTGAAAGTACTGACG	/5ATTO550N/CTGAAAGTACTGACG		CTGAAAGTACTGACG
59	/mal/GCTTATTATGGACTTC		/5ATTO550N/GAAGTCCATAATAAGC	/5Alex647N/GAAGTCCATAATAAGC	GAAGTCCATAATAAGC
60	/mal/ACAAAACTGCTGTCG		/5ATTO550N/CGACAGCAGTTTTGT	/5Alex647N/CGACAGCAGTTTTGT	CGACAGCAGTTTTGT
61	/mal/TCTTATTCCCGAATA		/5ATTO550N/TATTCGGGAATAAGA	/5Alex647N/TATTCGGGAATAAGA	TATTCGGGAATAAGA
62	/mal/TAGGGGAACAGGTTG	/5Alex488N/CAACCTGTTCCCCTA	/5ATTO550N/CAACCTGTTCCCCTA		CAACCTGTTCCCCTA
63	/mal/AATTAGCTTAAGAGAGT	/5Alex488N/ACTCTCTTAAGCTAATT	/5ATTO550N/ACTCTCTTAAGCTAATT		ACTCTCTTAAGCTAATT
65	/mal/GATAAATATTTTACAGAGT	/5Alex488N/ACTCTGTAAAATATTTATC	/5ATTO550N/ACTCTGTAAAATATTTATC		ACTCTGTAAAATATTTATC
66	/mal/TACGTGCTTTGGTT	/5Alex488N/AACCAAAGCACGTA	/5ATTO550N/AACCAAAGCACGTA	/5Alex647N/AACCAAAGCACGTA	AACCAAAGCACGTA
67	/mal/GACGACGAAGGC	/5Alex488N/GCCTTCGTCGTC	/5ATTO550N/GCCTTCGTCGTC	/5Alex647N/GCCTTCGTCGTC	GCCTTCGTCGTC
68	/mal/CTTCTTGTGGAACC	/5Alex488N/GGTTCCACAAGAAG	/5ATTO550N/GGTTCCACAAGAAG		GGTTCCACAAGAAG
69	/mal/CCCGGCAGTT	/5Alex488N/AACTGCCGGG		/5Alex647N/AACTGCCGGG	AACTGCCGGG
70	/mal/AACCAAACTGACCG	/5Alex488N/CGGTCAGTTTGGTT		/5Alex647N/CGGTCAGTTTGGTT	CGGTCAGTTTGGTT
71	/mal/TCACCCCCAGC		/5ATTO550N/GCTGGGGGTGA	/5Alex647N/GCTGGGGGTGA	GCTGGGGGTGA
72	/mal/AACGCGACGGAT	/5Alex488N/ATCCGTCGCGTT	/5ATTO550N/ATCCGTCGCGTT	/5Alex647N/ATCCGTCGCGTT	ATCCGTCGCGTT
74	/mal/ATTTGCTTCGACGA		/5ATTO550N/TCGTCGAAGCAAAT	/5Alex647N/TCGTCGAAGCAAAT	TCGTCGAAGCAAAT
75	/mal/CGCTTGGGTGTTTA	/5Alex488N/TAAACACCCAAGCG	/5ATTO550N/TAAACACCCAAGCG		TAAACACCCAAGCG
76	/mal/CTGTCGGTCGTCA		/5ATTO550N/TGACGACCGACAG	/5Alex647N/TGACGACCGACAG	TGACGACCGACAG
77	/mal/ATTTCAACAAATATTGTT		/5ATTO550N/AACAATATTTGTTGAAAT	/5Alex647N/AACAATATTTGTTGAAAT	AACAATATTTGTTGAAAT
79	/mal/GCCGGAAGTGGT		/5ATTO550N/ACCACTTCCGGC	/5Alex647N/ACCACTTCCGGC	ACCACTTCCGGC
80	/mal/CGGGGCACCA		/5ATTO550N/TGGTGCCCCG	/5Alex647N/TGGTGCCCCG	TGGTGCCCCG
81	/mal/CAAGGAACTACCGA	/5Alex488N/TCGGTAGTTCCTTG	/5ATTO550N/TCGGTAGTTCCTTG	/5Alex647N/TCGGTAGTTCCTTG	TCGGTAGTTCCTTG

## Sheet: Supplementary_Table_2
Supplementary Table 2: Antibodies, clones and manufacturers
Antigen	Clone(s)	Manufacturer	Catalog No.	RRID	CODEX oligo	Exposure time
aDefensin 5	EPR14309(B)	Abcam	ab245946	AB_2864387	60	1/2s
Annexin A1	MRQ-3	Cell Marque	custom	AB_2864398	42	1/2s
Arginase-1	poly	Novus Biologicals	NBP1-32731	AB_10003985	43	1/2s
a-SMA	poly	Abcam	ab5694	AB_2223021	69	1/5s
BCL-2	124	Cell Marque	custom	AB_2864404	41	1/4s
Bigylcan	EPR20235	Abcam	ab251501	AB_2864376	26	1/2s
B-catenin	14	Cell Marque	custom	AB_2864397	51	1/2s
CD3	MRQ-39	Cell Marque	custom	AB_2864399	77	1/5s
CD4	EPR6855	Abcam	ab181724	AB_2864377	20	1/2s
CD8	C8/144B	Cell Marque	custom	AB_2864400	8	1/2s
CD11b	EPR1344	Abcam	ab216445	AB_2864378	28	1/4s
CD11c	EP1347Y	Abcam	ab216655	AB_2864379	49	1/2s
CD15	MMA	BD Biosciences	559045	AB_397181	14	1/8.5s
CD20	rIGEL/773	Novus Biologicals	NBP2-54591	AB_2864380	48	1/8.5s
CD21	Bu32	Biolegend	354902	AB_11219188	21	1/2s
CD25	4C9	Cell Marque	custom	AB_2864401	24	1/2s
CD31	C31.3 + C31.7 + C31.10	Novus Biologicals	NBP2-47785	AB_2864381	68	1/5s
CD34	QBEnd/10 + HPCA1/763	Novus Biologicals	NBP2-47909	AB_2864382	38	1/4s
CD36	D8L9T	Cell Signaling Technology	14347	AB_2798458	74	1/2s
CD38	EPR4106	Abcam	ab176886	AB_2864383	66	1/2s
CD45	2B11+PD7/263	Novus Biologicals	NBP2-34528	AB_2864384	56	1/12s
CD56	MRQ-42	Cell Marque	custom	AB_2864402	29	1/2s
CD57	HCD57	Biolegend	322325	AB_2563757	30	1/8.5s
CD68	KP-1	Biolegend	916104	AB_2616797	70	1/4s
CD73	poly	R&D Systems	AF5795	AB_1964487	75	1/4s
CD79a	HM47	Biolegend	333502	AB_1089078	46	1/2s
CD138	B-A38	Invitrogen	MA1-10091	AB_11153181	76	1/15s
CD163	EDHu-1	Novus Biologicals	NB110-40686	AB_714951	45	1/4s
CD206	poly	R&D Systems	AF2534	AB_2063019	55	1/6s
CDX2	D11D10	Cell Signaling Technology	custom	AB_2864405	71	1/2s
CHGA	LK2H10 + PHE5 + CGA/414	Novus Biologicals	NBP2-34674	AB_2864388	2	1/2s
CK7	OV-TL12/30	Novus Biologicals	NBP2-47940	AB_2864389	3	1/4s
Collagen IV	poly	Novus Biologicals	ab6586	AB_305584	33	1/4s
COX-2	495222	R&D Systems	MAB4198	AB_2084939	25	1/6s
Cytokeratin	C-11	Biolegend	628602	AB_439775	67	1/8.5s
EGFR	D38B1	Cell Signaling Technology	custom	AB_2864406	58	1/2s
FoxP3	236A/E7	Invitrogen	14-4777-80	AB_467555	61	1/4s
HLA-DR	EPR3692	Abcam	ab215985	AB_2864390	65	1/8.5s
H, K, Pase (PP)	2B6	MBL International	D032-3	AB_2063272	36	1/20s
IDO	D5J4E	Cell Signaling Technology	custom	AB_2864407	59	1/2s
Ki-67	B56	BD Biosciences	556003	AB_396287	6	1/5s
MMP-9	L51/82	Biolegend	819701	AB_2564833	80	1/12s
MUC6	CL-H5	Abcam	ab212646	AB_2864391	81	1/2s
MUC-1/EMA	955	NSJ Bioreagents	V2372SAF	AB_2864392	15	1/4s
MUC-2	996/1	Novus Biologicals	NB120-11197	AB_791261	63	1/12s
MUC-5AC	CLH2	Novus Biologicals	NBP2-44455	AB_2864386	79	1/8.5s
Nestin	196908	R&D Systems	MAB1259	AB_2251304	53	1/8.5s
PD-1	D4W2J	Cell Signaling Technology	custom	AB_2864408	23	1/2s
PGA3	7G3	Abcam	ab50123	AB_881968	44	1/20s
pH2A.X	EP854(2)Y	Abcam	ab215967	AB_2864385	57	1/2s
PD-L1	E1L3N	Cell Signaling Technology	custom	AB_2864409	11	1/2s
Podoplanin	D2-40	Biolegend	916606	AB_2565820	32	1/3s
p53	D07	Cell Marque	custom	AB_2864403	52	1/2s
p63	D2K8X	Cell Signaling Technology	custom	AB_2864410	5	1/2s
SOX2	D6D9	Cell Signaling Technology	custom	AB_2864411	72	1/2s
S100A4	D9F9D	Cell Signaling Technology	custom	AB_2864412	62	1/2s
Vimentin	RV202	BD Biosciences	550513	AB_393716	7	1/4s

## Sheet: Supplementary_Table_3
Supplementary Table 3: CODEX Multicycle Antibody panel
Cycle	CH1	Exp Time	Ax488	Oligo	Clone	Dilution	Exp Time	Cy3	Oligo	Clone	Dilution	Exp Time	Cy5	Oligo	Clone	Dilution	Exp Time
1	Hoechst	1/150s	Blank				1/2s	Blank				1/2s	Blank				1/2s
2	Hoechst	1/150s	CHGA	2	LK2H10 + PHE5 + CGA/414	1:100	1/2s	PD-L1	11	E1L3N	1:50	1/2s	CD56	29	MRQ-42	1:50	1/2s
3	Hoechst	1/150s	CK7	3	OV-TL12/30	1:100	1/4s	FoxP3	61	236A/E7	1:100	1/4s	CD90	21	EPR3132	1:200	1/2s
4	Hoechst	1/150s	MUC-1/EMA	15	955	1:100	1/4s	pH2A.X	57	EP854(2)Y	1:50	1/2s	PD-1	23	D4W2J	1:50	1/2s
5	Hoechst	1/150s	CD11b	28	EPR1344	1:200	1/4s	CD4	20	EPR6855	1:100	1/2s	Ki-67	6	B56	1:100	1/5s
6	Hoechst	1/150s	CD31	68	C31.3+...+...	1:200	1/5s	CD25	24	4C9	1:100	1/2s	CDX2	71	try EPR2764Y	1:100	1/2s
7	Hoechst	1/150s	CD15	14	MMA	1:200	1/8.5s	CD20	48	rIGEL/773	1:200	1/8.5s	Annexin A1	42	MRQ-3	1:100	1/2s
8	Hoechst	1/150s	a-SMA	69	poly	1:200	1/5s	CD11c	49	EP1347Y	1:100	1/2s	Nestin	53	196908	1:100	1/8.5s
9	Hoechst	1/150s	Collagen I	62	EPR7785	1:400	1/8.5s	SOX9	26	D8G8H	1:100	1/8.5s	p16	59	G175-405	1:400	1/4s
10	Hoechst	1/150s	Cytokeratin	67	C-11	1:200	1/8.5s	p53	52	D07	1:25	1/2s	MUC-5AC	79	CLH2	1:200	1/8.5s
11	Hoechst	1/150s	Vimentin	7	RV202	1:200	1/4s	EGFR	58	D38B1	1:50	1/2s	CD36	74	D8L9T	1:100	1/3s
12	Hoechst	1/150s	Blank				1/600s	HLA-DR	65	EPR3692	1:200	1/8.5s	YAP	72	D8H1X	1:200	1/2s
13	Hoechst	1/150s	Blank				1/600s	BCL-2	41	124	1:50	1/2s	CD79a	46	HM47	1:100	1/2s
14	Hoechst	1/150s	Blank				1/600s	FAP	36	poly	1:100	1/2s	p63	5	D2K8X	1:100	1/8.5s
15	Hoechst	1/150s	Blank				1/600s	MUC-2	63	996/1	1:100	1/8.5s	CD3	77	MRQ-39	1:100	1/2s
16	Hoechst	1/150s	Blank				1/600s	CD45	56	2B11+PD7/263	1:400	1/8.5s	CD8	8	C8/144B	1:50	1/5s
17	Hoechst	1/150s	Blank				1/600s	CD57	30	HCD57	1:200	1/4s	PGA3	44	7G3	1:400	1/20s
18	Hoechst	1/150s	Blank				1/600s	aDefensin 5	60	EPR14309(B)	1:100	1/2s	CD68	70	KP-1	1:100	1/4s
19	Hoechst	1/150s	Blank				1/600s	CD34	38	QBEnd/10	1:100	1/4s	Collagen IV	33	poly	1:200	1/4s
20	Hoechst	1/150s	Blank				1/600s	CD38	66	EPR4106	1:100	1/5s	Podoplanin	32	D2-40	1:200	1/3s
21	Hoechst	1/150s	Blank				1/600s	CD163	45	EDHu-1	1:200	1/4s	B-catenin	51	14	1:50	1/2s
22	Hoechst	1/150s	Blank				1/600s	CD138	76	B-A38	1:100	1/8.5s	Arginase-1	43	poly	1:100	1/2s
23	Hoechst	1/150s	Blank				1/600s	CD73	75	poly	1:100	1/4s	CD206	55	poly	1:100	1/2s
24	Hoechst	1/150s	Blank				1/600s	53BP1	81	EPR2172	1:100	1/2s	COX-2	25	495222	1:100	1/2s
25	Hoechst	1/150s	Blank				1/600s	MMP-9	80	L51/82	1:400	1/4s	Blank				1/600s
26	Hoechst	1/150s	Blank				1/2s	Blank				1/2s	Blank				1/2s
27	Hoechst	1/150s	Blank				1/600s	Blank				1/600s	DRAQ5			1:700	1/6s
28	H&E	Bright field	1/150s
